1 **Title**

2

3 Epilepsy gene therapy using non-integrating lentiviral delivery of an engineered potassium channel  
4 gene

5

6

7 **Running title**

8

9 Engineered K channel therapy for epilepsy

10

11

12 **Author names and affiliations**

13

14 Albert Snowball\*<sup>1</sup>, Elodie Chabrol\*<sup>1</sup>, Robert C. Wykes\*<sup>1</sup>, Andreas Lieb<sup>1</sup>, Kevan S. Hashemi<sup>2</sup>, Dimitri  
15 M. Kullmann<sup>#1</sup>, Matthew C. Walker<sup>#1</sup>, Stephanie Schorge<sup>#1</sup>

16

17 <sup>1</sup> Department of Clinical and Experimental Epilepsy, UCL Institute of Neurology, London WC1N 3BG,  
18 UK

19

20 <sup>2</sup> Open Source Instruments Inc., Watertown, MA 02472, USA

21

22 \* These authors contributed equally

23

24 <sup>#</sup> Joint corresponding authors: [s.schorge@ucl.ac.uk](mailto:s.schorge@ucl.ac.uk), [m.walker@ucl.ac.uk](mailto:m.walker@ucl.ac.uk), [d.kullmann@ucl.ac.uk](mailto:d.kullmann@ucl.ac.uk)

25 **Abstract**

26

27 Refractory focal neocortical epilepsy is a devastating disease for which there is frequently no  
28 effective treatment. Gene therapy represents a promising alternative, but treating epilepsy in this  
29 way involves irreversible changes to brain tissue, so vector design must be carefully optimized to  
30 guarantee safety without compromising efficacy. We set out to develop an epilepsy gene therapy  
31 vector optimized for clinical translation. The gene encoding the voltage-gated potassium channel  
32 Kv1.1, *KCNA1*, was codon-optimized for human expression and mutated to accelerate the channels'  
33 recovery from inactivation. For improved safety, this engineered potassium channel (EKC) gene was  
34 packaged into a non-integrating lentiviral vector under the control of a cell type-specific *CAMK2A*  
35 promoter. In a blinded, randomized, placebo-controlled pre-clinical trial, the EKC lentivector robustly  
36 reduced seizure frequency in a rat model of focal neocortical epilepsy characterized by discrete  
37 spontaneous seizures. This demonstration of efficacy in a clinically relevant setting, combined with  
38 the improved safety conferred by cell type-specific expression and integration-deficient delivery,  
39 identify EKC gene therapy as ready for clinical translation in the treatment of refractory focal  
40 epilepsy.

41 **Keywords**

42

43 Epilepsy / gene therapy / lentivirus / non-integrating / potassium channel

## 44 Introduction

45

46 Epilepsy affects over 60 million people worldwide (Ngugi et al., 2010). Even with optimal treatment  
47 approximately 30% remain resistant to pharmacotherapy (Kwan et al., 2011; Picot et al., 2008). The  
48 development of new anti-epileptic drugs in the last 20 years has had little impact on refractory  
49 epilepsy; people with inadequately controlled seizures continue to experience major co-morbidities,  
50 social exclusion, and an annual rate of sudden unexpected death in epilepsy (SUDEP) of 0.5-1%  
51 (Devinsky, 2011; Hoppe and Elger, 2011). Although surgical resection of the epileptogenic zone can  
52 result in seizure freedom, it is unsuitable for over 90% of refractory epilepsy patients (Lhatoo et al.,  
53 2003). Surgical intervention in focal neocortical epilepsy (FNE) is further complicated by the high risk  
54 of damage to eloquent regions of the cortex involved in functions such as memory, language, vision  
55 or fine motor control (Schuele and Lüders, 2008). People with FNE are therefore often left with very  
56 few, usually palliative, treatment options, and there is an urgent need to develop alternative  
57 therapies.

58

59 Gene therapy is one promising option (Kullmann et al., 2014), but major hurdles remain in achieving  
60 stable, predictable and safe transgene expression with viral vectors. Because focal seizures often  
61 arise from brain areas very close to eloquent cortex, lentiviral vectors, which generally lead to rapid,  
62 stable and, most importantly, spatially-restricted transgene expression (Lundberg et al., 2008), are  
63 an attractive delivery tool. In addition, the large packaging capacity of lentivectors allows a wide  
64 choice of promoter-transgene combinations (Kantor et al., 2014), which can further increase the  
65 specificity of expression. Hitherto, clinical trials with lentivectors for CNS disorders have been mainly  
66 restricted to *ex-vivo* treatment of hematopoietic stem cells (Biffi et al., 2013, 2013; Cartier et al.,  
67 2009). However, a recent trial using a lentivector injected directly into the striatum has  
68 demonstrated safety and tolerability in Parkinson's disease, with evidence of decreased L-DOPA  
69 requirement (Palfi et al., 2014).

70

71 Early studies of gene therapy for epilepsy focused on acutely precipitated seizures, which often  
72 translate poorly (Galanopoulou et al., 2012). More recent strategies, mainly involving delivery of  
73 adeno-associated viral (AAV) vectors to models of temporal lobe epilepsy, have shown that the  
74 development of seizures after an epileptogenic insult (epileptogenesis) can be attenuated  
75 (Bovolenta et al., 2010; Haberman et al., 2003; Kanter-Schlifke et al., 2007; Lin et al., 2006; McCown,  
76 2006; Nikitidou et al., 2014; Noè et al., 2008; Richichi et al., 2004; Woldbye et al., 2010). We have  
77 recently reported several approaches to gene therapy in a model of *epilepsia partialis continua* (EPC)  
78 induced by tetanus neurotoxin (TeNT) injection into the rat motor cortex (Kätzel et al., 2014; Wykes  
79 et al., 2012). In this model pathological high-frequency electrocorticographic (ECoG) activity is

80 prominent, but discrete seizures lasting over 20 seconds are rare. Lentiviral overexpression of the  
81 human potassium channel Kv1.1, encoded by *KCNA1*, was highly effective at reducing pathological  
82 high frequency activity (Wykes et al., 2012). *In vitro* studies showed that Kv1.1 overexpression  
83 reduced both intrinsic neuronal excitability and glutamate release from transduced pyramidal  
84 neurons (Heeroma et al., 2009; Wykes et al., 2012). Importantly, both effects were graded, with  
85 neither neuronal excitability nor neurotransmitter release completely abolished. However, it  
86 remains unclear whether these graded effects on excitability and transmitter release, and the  
87 reduction of pathological ECoG activity in the motor cortex, can translate to the therapeutic  
88 suppression of intermittent discrete seizures.

89  
90 Gene therapy based on overexpression of Kv1.1, or other proteins that reduce neuronal activity,  
91 requires effective targeting of transgene expression to excitatory neurons. Our previous work relied  
92 on driving *KCNA1* overexpression with a strong viral promoter, CMV. Although this promoter may  
93 bias expression to excitatory neurons in rat, recent data suggests it is not capable of doing so in non-  
94 human primates (Lerchner et al., 2014; Yaguchi et al., 2013). Restricting transgene expression to  
95 particular neuronal subtypes can however be achieved with the use of cell type specific promoters,  
96 but it is not yet known if these can support a level of expression sufficient to dampen neuronal  
97 activity. Finally, current clinical guidance seeks to reduce the risk of insertional mutagenesis  
98 associated with viral integration into the genome (Baum et al., 2004; Hacein-Bey-Abina et al., 2003),  
99 but there are few data indicating whether non-integrating lentiviral constructs can yield strong,  
100 stable transgene expression within the CNS.

101  
102 To bring potassium channel gene therapy closer to the clinic, we have developed an optimized  
103 lentiviral vector designed to boost Kv1.1 expression and reduce its inactivation with an engineered  
104 *KCNA1* gene (EKC), and improve safety with a cell type specific (*CAMK2A*) promoter and non-  
105 integrating delivery vector (Rahim et al., 2009; Yáñez-Muñoz et al., 2006). The lentivector was tested  
106 for efficacy in a rat model of FNE characterised by long-lasting, discrete occipital cortex seizures  
107 (Chang et al., 2018). In a blinded, randomized, placebo-controlled pre-clinical trial, EKC gene therapy  
108 rapidly and persistently suppressed spontaneous seizures relative to a control lentivector without  
109 EKC.

110

## 111 Results

112

### 113 A pilot study shows that *KCNA1* gene therapy suppresses spontaneous seizures in a visual cortex 114 epilepsy model

115

116 We first asked whether the CMV-driven *KCNA1* lentivector (CMV-*KCNA1*) used previously in a model  
117 of EPC (Wykes et al., 2012) was also effective in an epilepsy model characterized by discrete  
118 seizures. Epilepsy (Fig. 1A; Supp. Fig. 1) was induced in adult rats with a single injection of TeNT into  
119 the primary visual cortex. Seizures in this model typically last between 50 and 200 s, are  
120 accompanied by unilateral, bilateral or generalized convulsions, and evolve over several weeks  
121 before fading (Chang et al., 2018). To monitor local electrographic activity, a wireless ECoG  
122 transmitter was implanted with a subdural intracranial recording electrode positioned above the  
123 injection site. Two weeks after TeNT administration, following the establishment of epilepsy, animals  
124 were randomized into two groups and injected via a pre-implanted cannula with either the CMV-  
125 *KCNA1* lentivector or a control vector expressing only green fluorescent protein (GFP). Injections  
126 were delivered directly into the seizure focus and followed by a further 4 weeks of ECoG recording  
127 (Fig. 1B).

128

129 The CMV-*KCNA1* lentivector transduced neurons within a narrow column of the cortex (Fig. 1C). As is  
130 typical of this model (Chang et al., 2018), the total number of seizures experienced by each animal  
131 over the 6 weeks of recording was highly variable (Fig. 1D). Consequently, to compare seizure  
132 frequency between the two treatment groups the numbers of seizures experienced each week were  
133 normalized to the number experienced in the week preceding treatment (week -1, or baseline (BI)  
134 week). Despite the small sample size (6 treated vs. 5 controls), the CMV-*KCNA1* lentivector  
135 significantly reduced normalized seizure frequency compared to controls in the weeks following  
136 treatment (generalized log-linear mixed model on weeks 0 – 3, treatment\*week interaction effect:  
137  $F(1,40) = 4.851$ ,  $p = 0.033$ ; Fig. 1E). The therapeutic effect emerged rapidly; plots of normalized  
138 cumulative daily seizure frequency for the two groups diverged within 3 days of lentivector injection,  
139 consistent with rapid transgene expression, as seen previously in the motor cortex model (Fig. 1F).

140

141 This pilot study strongly suggests that *KCNA1* gene therapy can suppress spontaneous discrete  
142 seizures. However, the CMV-*KCNA1* lentivector tested is poorly suited for clinical translation. We  
143 therefore set out to develop an optimized vector with improved safety and efficacy.

144

### 145 Design and characterization of an EKC gene therapy optimized for clinical translation

146

147 The transfer plasmid used to synthesize the optimized lentivector differed from the original CMV-  
148 *KCNA1* construct in several ways (Fig. 2A). The non-cell type specific CMV promoter was replaced  
149 with a 1.3 kb human *CAMK2A* promoter to bias expression to excitatory neurons (Dittgen et al.,  
150 2004; Yaguchi et al., 2013). The *KCNA1* gene was codon-optimized for expression in human cells, and  
151 mutated to introduce an I400V amino acid substitution normally generated by RNA editing. This  
152 substitution elicits a 20-fold increase in the rate at which Kv1.1 channels recover from inactivation  
153 (Bhalla et al., 2004). For pre-clinical evaluation, the coding sequence of a short-lived dscGFP reporter  
154 was linked to the EKC gene by a T2A element, which permits dual peptide expression from a single  
155 promoter. To ensure that the EKC construct could produce functional Kv1.1 channels, we performed  
156 whole-cell patch clamp recordings in transfected Neuro-2a cells, a line selected for its high *Camk2a*  
157 promoter activity. Robust non-inactivating Kv1.1 currents were recorded in cells transfected with the  
158 EKC plasmid (Fig. 2B).

159  
160 The EKC transfer plasmid was packaged into a non-integrating lentiviral vector (Yáñez-Muñoz et al.,  
161 2006). When injected into the rat visual cortex, this lentivector drove strong, localized expression of  
162 the dscGFP reporter (Fig. 2C). Imaging of sequential brain slices yielded an estimated transduction  
163 volume of approximately 0.074 mm<sup>3</sup> (Supp. Fig. 2). Immunohistochemistry revealed no visible  
164 overlap between dscGFP expression and glial fibrillary acidic protein (GFAP) staining (0/512 dscGFP+  
165 cells stained for GFAP, n = 3 animals; Fig. 2Di). In contrast, all dscGFP+ cells stained positively for the  
166 neuronal marker NeuN (714/714, n = 3 animals; Fig. 2Dii). These data indicate that transgene  
167 expression from the EKC lentivector is restricted to neurons. There was minimal overlap between  
168 dscGFP expression and staining for glutamic acid decarboxylase 67 (GAD67), an enzymatic marker  
169 for GABAergic neurons (3/603 dscGFP+ cells stained for GAD67, n = 3 animals; Fig. 2Diii). This  
170 suggests that EKC transgene expression is largely restricted to excitatory neurons.

### 171 172 **EKC gene therapy reduces seizure frequency in a blinded, randomized pre-clinical trial**

173  
174 To test the therapeutic efficacy of the EKC lentivector, we designed a blinded, randomized, placebo-  
175 controlled pre-clinical trial, and selected normalized seizure frequency as the primary outcome  
176 measure. Eleven days after injection of TeNT into the visual cortex, 26 rats were randomized into  
177 two groups and injected via a pre-implanted cannula with either the EKC lentivector or its dscGFP-  
178 only control. ECoG recordings were continued for a further 4 weeks. The timeline was altered from  
179 that of the pilot study to treat after 11 days in order to capture the period when seizure activity is at  
180 its highest (2 – 4 weeks following TeNT injection) (Fig. 3A).

181

182 To minimize the confounding influence of animals that displayed a very low seizure frequency prior  
183 to treatment, subjects were excluded if they exhibited fewer than five seizures in the week  
184 preceding lentiviral delivery (the baseline week). This criterion, applied before unblinding, led to the  
185 exclusion of eight animals (6 EKC, 2 control). Of the remaining 18, all but one survived for the  
186 duration of recording. This rat (from the EKC group) was culled in the final week due to detachment  
187 of its headpiece. However, because the subject had already passed through the period of peak  
188 seizure activity, and in order to maximise the amount of data obtained from the study, this  
189 incomplete dataset was included in the overall analysis. Again, this decision was made before  
190 unblinding.

191  
192 There was no significant difference between the treatment groups in the number of seizures  
193 experienced in the week preceding virus injection (control median = 11 (IQR 10 – 26), EKC median =  
194 10 (IQR 7.5 – 12); Mann Whitney U test,  $p = 0.185$ ). Analysis of the primary outcome measure  
195 indicated that EKC therapy robustly decreased normalized seizure frequency compared to controls in  
196 the weeks following treatment (generalized log-linear mixed model on weeks 0 – 3, treatment\*week  
197 interaction effect:  $F(1,67) = 29.704$ ,  $p < 0.001$ ; Fig. 3B). The size of the effect was larger than that  
198 observed in the pilot study, suggesting that the EKC gene is more effective than its wild-type *KCNA1*  
199 counterpart at suppressing neuronal hyperexcitability. As in the pilot study, the reduction in seizure  
200 frequency lasted for the duration of recording, and the absolute effect size only decreased as  
201 seizures abated in the control group. Again the therapeutic effect emerged rapidly, with plots of  
202 normalized cumulative daily seizure frequency for the two groups diverging 2 days after treatment  
203 (Fig. 3C).



204 **Discussion**

205

206 EKC gene therapy represents an effective new treatment for focal neocortical seizures in a format  
207 adapted to improve safety and suitability for human use. The results presented here provide strong  
208 justification for the further clinical development of EKC therapy.

209

210 We have previously shown that overexpression of Kv1.1 can reduce the frequency of brief (< 1 s),  
211 high-frequency epileptiform discharges in a motor cortex TeNT model of EPC (Wykes et al., 2012).  
212 However, this study did not investigate whether Kv1.1 overexpression could inhibit discrete seizures  
213 lasting 1 – 2 minutes, more typical of common forms of focal epilepsy. We show here, in two  
214 independent trials, that Kv1.1 overexpression is indeed sufficient to reduce the frequency of  
215 seizures, although interestingly seizure duration was not altered. This is most simply explained by  
216 proposing that seizure initiation is rapidly accompanied by propagation to other brain areas, beyond  
217 the lentivector-treated region, consistent with the convulsions seen in the majority of seizures in the  
218 visual cortex TeNT model (Chang et al., 2018).

219

220 Injection of TeNT into the occipital cortex induced seizures that lasted markedly longer (50 – 150 s)  
221 than the epileptiform bursts evoked by TeNT injection in motor cortex (< 1 s) (Wykes et al., 2012).  
222 The difference, which parallels that seen with occipital lobe seizures and EPC in human patients, may  
223 be a consequence of different connectivity in the occipital and motor cortices. Further studies will be  
224 needed to determine how cortical architecture impacts the type of epileptiform activity induced by  
225 TeNT insult.

226

227 Lentiviral gene therapy approaches are becoming more common in CNS disorders, and have shown  
228 good safety and tolerability even in extended trials (Palfi et al., 2014). However, a potential safety  
229 concern with retroviral vectors is the inherent risk of insertional mutagenesis (Baum et al., 2004;  
230 Hacein-Bey-Abina et al., 2003). This risk can be minimized by rendering vectors integration-deficient.  
231 The popularity of non-integrating lentiviruses for therapeutic gene transfer is growing, and the  
232 vectors have already demonstrated pre-clinical efficacy in the treatment of degenerative retinal  
233 disease and haemophilia B (Suwanmanee et al., 2014; Yáñez-Muñoz et al., 2006). The non-  
234 integrating EKC lentivirus described here drove strong, localized transgene expression after direct  
235 injection into the rat neocortex, and rapidly and persistently suppressed focal seizure activity. This  
236 supports the use of integration-deficient vectors as safe, effective delivery tools for gene therapy of  
237 neurological disease.

238

239 In the case of epilepsy, an additional safety concern is the possibility of potassium channel  
240 overexpression in interneurons, which could aggravate seizure activity by exacerbating rather than  
241 attenuating local excitability. To mitigate this risk we have used a human *CAMK2A* promoter that in  
242 rats led to very little expression in GABAergic cells. Promoter specificity can differ between species  
243 (Lerchner et al., 2014; Yaguchi et al., 2013), and the specificity of the human *CAMK2A* promoter for  
244 excitatory glutamatergic neurons will ultimately need to be validated in the human brain. Evidently,  
245 if EKC gene therapy is to progress to the clinic, such validation will need to be performed in the  
246 absence of a fluorescent reporter.

247

248 Because the role of potassium channels, including Kv1.1, in regulating neuronal excitability is  
249 conserved across a broad range of neurons, potassium channel overexpression may hold therapeutic  
250 promise in the treatment of other diseases characterized by neuronal hyperexcitability. There is  
251 currently an unmet clinical need for new treatments of chronic pain, and a variety of gene therapy  
252 approaches aimed at reducing the excitability of dorsal root ganglion neurons have already  
253 demonstrated pre-clinical efficacy (Snowball and Schorge, 2015). Other disorders such as Parkinson's  
254 disease are associated with excessive activity in specific groups of neurons (Lobb, 2014), and could  
255 be candidates for treatment with an appropriate combination of potassium channel subtype and cell  
256 type specific promoter.

257 **Materials and methods**

258

259 *Molecular biology*

260 Lentiviral transfer plasmids were constructed using standard subcloning techniques. *KCNA1* was  
261 codon optimized for human expression using GeneOptimizer® software, and synthesized using  
262 GeneArt® (Thermo Fisher Scientific). All plasmids were fully sequenced before use. Sequences are  
263 available on request.

264

265 *Voltage clamp recordings*

266 Neuro-2a cells were grown in Gibco® Dulbecco's Modified Eagle Medium (DMEM) + GlutaMAX™  
267 (Thermo Fisher Scientific) supplemented with 10% heat-inactivated foetal bovine serum (Thermo  
268 Fisher Scientific), 1% penicillin/streptomycin (Thermo Fisher Scientific) and 1% non-essential amino  
269 acids (Sigma). Cultures were maintained in logarithmic growth phase in a humidified 5% CO<sub>2</sub>  
270 atmosphere at 37 °C. Transfections were performed according to the manufacturer's instructions  
271 using TurboFect™ transfection reagent (Thermo Fisher Scientific). Transfected cells were plated onto  
272 13 mm borosilicate glass coverslips (VWR). Coverslips were placed into the chamber of a BX51WI  
273 fixed-stage upright microscope equipped with UMPLFLN 10× and LUMPLFLN 40× water-immersion  
274 objectives (Olympus). Coverslips were submerged in a static bath of extracellular solution with the  
275 following composition (in mM): 140 NaCl, 4 KCl, 1.8 CaCl<sub>2</sub>, 2 MgCl<sub>2</sub>, 10 HEPES (pH 7.35, osmolarity  
276 ~301 mOsm/L). Filamented borosilicate glass micropipettes (GC150-F; Warner Instruments) were  
277 pulled to tip resistances between 2.0 and 3.0 MΩ using a P-97 Flaming/Brown micropipette puller  
278 (Sutter Instrument Company). Micropipettes were filled with an intracellular solution of the  
279 following composition (in mM): 140 KCl, 10 HEPES, 10 EGTA (pH 7.35, osmolarity ~291 mOsm/L).  
280 Macroscopic currents were recorded under voltage clamp using the whole-cell patch clamp  
281 configuration. The voltage step protocol used was as follows: cells were held at a resting potential of  
282 -80 mV and currents evoked by 200 ms depolarising steps delivered in 10 mV increments up to +20  
283 mV. A 40 ms hyperpolarising step to -100 mV was included before returning to baseline. Data were  
284 filtered at 3 kHz and acquired at 10 kHz using WinWCP software (J. Dempster, University of  
285 Strathclyde) and an Axon Multiclamp 700B amplifier (Molecular Devices). Series resistance  
286 compensation was employed throughout, with prediction and correction components adjusted to  
287 80% and the bandwidth set to 1.2 kHz. Cells with series resistance greater than 10 MΩ were  
288 excluded from the analysis. All recordings were made at room temperature (23 – 26 °C). The liquid  
289 junction potential, calculated to be +4.1 mV, was left uncorrected. Leak currents were minimal and  
290 left unsubtracted.

291

292 For analysis, evoked currents were taken as the steady-state current in the last 40 ms of each  
293 voltage step. Baseline holding currents were subtracted before division by cell capacitance to  
294 generate current density values. To calculate normalized conductance, the current density at each  
295 voltage step was divided by the step potential minus the potassium reversal potential (−91.34 mV).  
296 This generates raw conductance values that are corrected for the variation in K<sup>+</sup> driving force which  
297 accompanies stepwise changes in membrane potential. Plots of raw conductance against voltage for  
298 each EKC-transfected cell were fit with individual Boltzmann functions given by the equation:

$$G = A_2 + \frac{A_1 - A_2}{1 + e^{\frac{V - V_{0.5}}{k}}}$$

300  
301 where G is the conductance, V the voltage, A<sub>1</sub> the initial (minimum) conductance, A<sub>2</sub> the final  
302 (maximum) conductance, V<sub>0.5</sub> the voltage of half-maximal conductance, and k the slope factor. Raw  
303 conductance values were normalized to A<sub>1</sub> and A<sub>2</sub> of their own Boltzmann functions. Normalized  
304 conductance was then plotted against voltage for all EKC-transfected cells and mean values fit with a  
305 single Boltzmann function (Fig. 2Biii).

306

### 307 *Lentiviral synthesis*

308 The CMV-*KCNA1* lentivector was identical to that used in Wykes *et al.*, 2012 (Wykes et al., 2012). For  
309 the EKC lentivector and its dscGFP-only control, HEK293T producer cells were grown in Gibco®  
310 DMEM + GlutaMAX™ supplemented with 10% heat-inactivated foetal bovine serum and 1%  
311 penicillin/streptomycin. Cultures were maintained in logarithmic growth phase in a humidified 5%  
312 CO<sub>2</sub> atmosphere at 37 °C. Cells were split every 3 – 4 days using 0.05% Trypsin-EDTA (Thermo Fisher  
313 Scientific) and never grown for more than 15 passages. Cells were co-transfected with pMDG-VSV.G,  
314 pCMVdR8.74<sup>D64V</sup> and either the EKC transfer plasmid or its dscGFP-only control. The mass ratio of  
315 envelope to packaging to transfer plasmids was 1 : 2.5 : 1.5. Transfections were performed according  
316 to the manufacturer's instructions using Lipofectamine® 2000 (Thermo Fisher Scientific). The  
317 transfection medium was replaced after 18 hours. Two media harvests were collected, at 40 hours  
318 and 60 hours after transfection. Harvested media were pre-cleaned by centrifugation at 1000 rpm  
319 for 3 minutes at 4 °C and filtered through 0.45 µm micropores. Media were overlaid on a sucrose  
320 solution with the following composition (in mM): 50 Tris-HCl, 100 NaCl, 0.5 EDTA (pH 7.4, 10% w/v  
321 sucrose), and centrifuged at 20,000 rpm for 2 hours at 4 °C. Lentiviral pellets were resuspended in  
322 sterile PBS, aliquoted, snap-frozen and stored at −80 °C. Viral titre was approximated using the Lenti-  
323 X™ p24 rapid titer kit (Clontech). Each titration was performed in triplicate with 3 separate aliquots.  
324 Estimated titres were 2.42 × 10<sup>9</sup> IU/ml (EKC lentivector) and 4.26 × 10<sup>9</sup> IU/ml (dscGFP-only control).

325

### 326 *Surgical procedures*

327 All experiments were performed in accordance with the United Kingdom Animals (Scientific  
328 Procedures) Act 1986. Adult male rats (Sprague Dawley; 300-400g) were anesthetized and placed  
329 into a stereotaxic frame (Kopf). 15 ng of TeNT was injected into layer 5 of the right visual cortex in a  
330 final volume of 1.0  $\mu$ l at a rate of 100 nl/min (coordinates: 3 mm lateral, 7 mm posterior of bregma;  
331 1.0 mm deep from the pia). An ECoG transmitter (A3028E; Open Source Instruments, MA, USA) was  
332 implanted subcutaneously with a subdural intracranial recording electrode positioned above the  
333 injection site. A reference electrode was implanted in the contralateral hemisphere. A cannula  
334 (Plastics One) was positioned above the injection site for delivery of lentiviral vectors 11 or 14 days  
335 later. Each rat received a maximum of 2.0  $\mu$ l of lentivirus injected directly into the seizure focus.  
336 Animals injected with TeNT were housed separately in Faraday cages for the duration of the study.  
337

### 338 *ECoG acquisition and analysis*

339 ECoG was recorded continuously for up to 6 weeks after surgery. Data were acquired using A3028E  
340 implantable transmitters (0.3 – 160 Hz, 512 samples/s) and ancillary receivers and software (Open  
341 Source Instruments, Inc.). The method of seizure detection differed for the pilot study and the final  
342 pre-clinical trial. For the pilot study, ECoG traces were first divided into 1 s epochs. Four metrics  
343 (power, coastline, intermittency and coherence) were then quantified for each epoch, and their  
344 values compared to those from a user-curated library of epochs validated by video as representing  
345 seizure activity (Wykes et al., 2012). Matched values were fed into a consolidation script that  
346 returned all instances of 5 or more sequential epochs identified as containing seizure activity. All  
347 seizures in the consolidation output were verified by an experimenter. For the final pre-clinical trial,  
348 6 metrics were quantified for each epoch (power, coastline, intermittency, coherence, asymmetry  
349 and rhythm) and all matched values were manually checked for seizure activity without the use of a  
350 consolidation script. Seizure counts in this trial were performed by an experimenter blinded to the  
351 treatment. For all datasets the minimum duration for a seizure was set at 10 s.  
352

### 353 *Immunohistochemistry*

354 One week after lentivirus injection rats were terminally anesthetized with sodium pentobarbital  
355 (Euthatal; Merial) and transcardially perfused with cold (4 °C) heparinized PBS (80 mg/L heparin  
356 sodium salt; Sigma) followed by 4% paraformaldehyde (PFA) in PBS (Santa Cruz Biotechnology).  
357 Brains were removed and post-fixed in 4% PFA at 4 °C for a further 24 hours. After washing in PBS  
358 brains were sliced into 70  $\mu$ m coronal sections using a vibrating microtome (Leica) and stored free-  
359 floating at 4 °C in PBS plus 0.02% sodium azide (Sigma). For antibody staining, slices were  
360 permeabilized for 20 minutes in PBS plus 0.3% Triton X-100 (Sigma) before blocking for 1 hour in PBS  
361 plus 0.3% Triton X-100, 1% bovine serum albumin (Sigma) and 4% goat serum (Sigma). Slices were

362 incubated overnight at 4 °C in PBS plus 0.3% Triton X-100 and a rabbit anti-NeuN (diluted 1:750;  
363 ab177487; Abcam), mouse anti-GFAP (diluted 1:500; MAB3402; Merck Millipore) or mouse anti-  
364 GAD67 (diluted 1:500; MAB5406; Merck Millipore) primary antibody. After three 10 minute washes  
365 in PBS, slices were incubated at room temperature for 3 hours in PBS plus the relevant Alexa Fluor®  
366 594-conjugated secondary antibody (goat anti-rabbit (A-11037; Thermo Fisher Scientific) or goat  
367 anti-mouse (A-11005; Thermo Fisher Scientific); both diluted 1:750). After a further three 10 minute  
368 washes in PBS, slices were mounted onto plain glass microscope slides (Thermo Fisher Scientific)  
369 using Vectashield® HardSet™ mounting medium (Vector Laboratories) and borosilicate glass  
370 coverslips (VWR). Bright-field and fluorescence images were acquired using one of two microscopes:  
371 an Axio Imager A1 fluorescence microscope (Axiovision LE software) equipped with 2.5×, 10× and  
372 40× EC Plan-Neofluar non-immersion objectives, or an inverted LSM 710 confocal laser scanning  
373 microscope (ZEN 2009 software) equipped with 40× and 63× EC Plan-Neofluar oil-immersion  
374 objectives (all Zeiss). For the confocal microscope, dscGFP and Alexa Fluor® 594 were excited with  
375 the 488 nm and 561 nm lines of an argon or diode pumped solid state (DPSS) laser, respectively. All  
376 image processing was performed using ImageJ software. Composite images were assembled using  
377 the MosaicJ ImageJ plugin.

378

### 379 *Statistics*

380 Data from the pilot study were used to determine sample sizes for the final pre-clinical trial. We  
381 estimated that the maximal weekly seizure frequency would double from baseline, and we wished to  
382 detect with 80% power a 40% reduction from this maximum at  $p < 0.05$ . Given a mean baseline  
383 weekly seizure frequency of 5 or above, a modification of Lehr's formula (Lehr, 1992) for the Poisson  
384 distribution suggested 7 – 8 animals per group would be sufficient to detect a reduction in seizure  
385 frequency from 10 to 6 per week. Our modified Lehr's formula is given by the following equation:

386

$$n = \frac{4}{(\sqrt{\lambda_1} - \sqrt{\lambda_2})^2}$$

387

388 where  $n$  is the size of each sample (treatment group),  $\lambda_1$  the mean weekly seizure frequency before  
389 treatment, and  $\lambda_2$  the mean weekly seizure frequency after treatment.

390

391 Efficacy of treatment data (Fig. 1E, 3B) were analysed using a generalized log-linear mixed model  
392 with random effect of animal (autoregressive covariance) and fixed effects of treatment group,  
393 week, and the interaction between treatment group and week. Seizure counts in the week preceding  
394 treatment were compared using a Mann Whitney U test. Current densities at +20 mV (Fig. 2Bii) were  
395 compared using a Welch's one-way ANOVA followed by Games-Howell post-hoc tests.

396 **Acknowledgments**

397

398 We thank G. Schiavo (UCL Institute of Neurology) for the gift of TeNT, S. Hart (UCL Institute of Child  
399 Health) for the Neuro-2a cells, and A. J. Thrasher and W. Qasim (UCL Institute of Child Health) for the  
400 pMDG-VSV.G and pCMVdR8.74<sup>D64V</sup> plasmids. We are grateful to J. Cornford for technological  
401 assistance in the visualisation of example seizures, and for the animal care provided by members of  
402 our Biological Services Unit. This work was supported by the Medical Research Council, the  
403 Wellcome Trust, Epilepsy Research UK, a Marie Skłodowska-Curie Actions Research Fellowship, and a  
404 Royal Society University Research Fellowship.

405

406

407 **Author contributions**

408

409 AS designed, synthesized and characterized the EKC lentivector, and analyzed and interpreted data  
410 from the final pre-clinical trial. EC performed the final pre-clinical trial and analyzed and interpreted  
411 data from it. RCW performed the pilot study and analyzed and interpreted data from it. AL provided  
412 technical assistance for video/ECoG recordings. KSH designed and built the ECoG recording system,  
413 and analyzed and interpreted data from the pilot study. SS, DMK and MCW designed the study,  
414 supervised the experiments and interpreted the data. AS, SS, DMK and MCW wrote the manuscript  
415 with input from all co-authors.

416

417

418 **Conflicts of interest**

419

420 The authors have intellectual property on the use of engineered potassium channels. KSH is the  
421 majority share-holder of Open Source Instruments, Inc.

## 422 **The Paper Explained**

423

424 Problem:

425 Focal neocortical epilepsy is a serious and common disease that is frequently resistant to anti-  
426 epileptic drugs. Gene therapy is a promising treatment alternative to surgery to remove the seizure  
427 focus. In previous work, overexpression of *KCNA1*, encoding the voltage-gated potassium channel  
428 Kv1.1, suppressed pathological, high-frequency brain activity evoked by injecting tetanus toxin into  
429 the rat motor cortex. However, several features of the lentiviral vector used to deliver the *KCNA1*  
430 gene made it unsafe for human administration, and it was unclear if the reduction of pathological  
431 high-frequency activity would extend to a suppression of discrete seizures. We therefore developed  
432 a lentiviral vector optimized for clinical translation, and tested its effectiveness in a model of  
433 epilepsy characterized by discrete seizures.

434

435 Results:

436 To boost the efficacy of the gene therapy, *KCNA1* was codon-optimized for human expression and  
437 mutated to accelerate the recovery of Kv1.1 channels from inactivation. To improve safety, this  
438 engineered potassium channel gene was placed under the transcriptional control of a *CAMK2A*  
439 promoter to restrict expression to excitatory neurons, and packaged into a non-integrating lentiviral  
440 vector to reduce the risk of insertional mutagenesis. In a blinded, randomized, placebo-controlled  
441 pre-clinical trial, the EKC lentivector robustly reduced seizure frequency in a rat model of focal  
442 neocortical epilepsy characterized by discrete seizures.

443

444 Impact:

445 This demonstration of the anti-epileptic efficacy of *KCNA1* gene therapy in a clinically relevant  
446 setting, combined with the improved safety conferred by cell type specific expression and  
447 integration-deficient delivery, suggests EKC gene therapy is well placed for clinical translation in the  
448 treatment of drug-resistant focal epilepsy. To our knowledge this study represents the first  
449 successful use of a non-integrating lentiviral vector to treat an experimental model of a neurological  
450 disease, and addresses a major treatment gap for over 5 million people suffering from refractory  
451 focal epilepsy worldwide.



## 452 Bibliography

- 453 Baum, C., von Kalle, C., Staal, F.J.T., Li, Z., Fehse, B., Schmidt, M., Weerkamp, F., Karlsson, S.,  
454 Wagemaker, G., and Williams, D.A. (2004). Chance or necessity? Insertional mutagenesis in gene  
455 therapy and its consequences. *Mol. Ther. J. Am. Soc. Gene Ther.* *9*, 5–13.
- 456 Bhalla, T., Rosenthal, J.J.C., Holmgren, M., and Reenan, R. (2004). Control of human potassium  
457 channel inactivation by editing of a small mRNA hairpin. *Nat. Struct. Mol. Biol.* *11*, 950–956.
- 458 Biffi, A., Montini, E., Lorioli, L., Cesani, M., Fumagalli, F., Plati, T., Baldoli, C., Martino, S., Calabria, A.,  
459 Canale, S., et al. (2013). Lentiviral Hematopoietic Stem Cell Gene Therapy Benefits Metachromatic  
460 Leukodystrophy. *Science* *341*, 1233158.
- 461 Bovolenta, R., Zucchini, S., Paradiso, B., Rodi, D., Merigo, F., Mora, G.N., Osculati, F., Berto, E.,  
462 Marconi, P., Marzola, A., et al. (2010). Hippocampal FGF-2 and BDNF overexpression attenuates  
463 epileptogenesis-associated neuroinflammation and reduces spontaneous recurrent seizures. *J.*  
464 *Neuroinflammation* *7*, 81.
- 465 Cartier, N., Hacein-Bey-Abina, S., Bartholomae, C.C., Veres, G., Schmidt, M., Kutschera, I., Vidaud, M.,  
466 Abel, U., Dal-Cortivo, L., Caccavelli, L., et al. (2009). Hematopoietic stem cell gene therapy with a  
467 lentiviral vector in X-linked adrenoleukodystrophy. *Science* *326*, 818–823.
- 468 Chang, B.-L., Leite, M., Snowball, A., Chabrol, E., Leib, A., Walker, M.C., Kullmann, D.M., Schorge, S.,  
469 and Wykes, R.C. (2018). Semiology, clustering, periodicity and natural history of seizures in an  
470 experimental visual cortical epilepsy model. *BioRxiv* 289256.
- 471 Devinsky, O. (2011). Sudden, unexpected death in epilepsy. *N. Engl. J. Med.* *365*, 1801–1811.
- 472 Dittgen, T., Nimmerjahn, A., Komai, S., Licznarski, P., Waters, J., Margrie, T.W., Helmchen, F., Denk,  
473 W., Brecht, M., and Osten, P. (2004). Lentivirus-based genetic manipulations of cortical neurons and  
474 their optical and electrophysiological monitoring in vivo. *Proc. Natl. Acad. Sci. U. S. A.* *101*, 18206–  
475 18211.
- 476 Galanopoulou, A.S., Buckmaster, P.S., Staley, K.J., Moshé, S.L., Perucca, E., Engel, J., Jr, Löscher, W.,  
477 Noebels, J.L., Pitkänen, A., Stables, J., et al. (2012). Identification of new epilepsy treatments: issues  
478 in preclinical methodology. *Epilepsia* *53*, 571–582.
- 479 Haberman, R.P., Samulski, R.J., and McCown, T.J. (2003). Attenuation of seizures and neuronal death  
480 by adeno-associated virus vector galanin expression and secretion. *Nat. Med.* *9*, 1076–1080.
- 481 Hacein-Bey-Abina, S., Von Kalle, C., Schmidt, M., McCormack, M.P., Wulffraat, N., Leboulch, P., Lim,  
482 A., Osborne, C.S., Pawliuk, R., Morillon, E., et al. (2003). LMO2-associated clonal T cell proliferation in  
483 two patients after gene therapy for SCID-X1. *Science* *302*, 415–419.
- 484 Heeroma, J.H., Henneberger, C., Rajakulendran, S., Hanna, M.G., Schorge, S., and Kullmann, D.M.  
485 (2009). Episodic ataxia type 1 mutations differentially affect neuronal excitability and transmitter  
486 release. *Dis. Model. Mech.* *2*, 612–619.
- 487 Hoppe, C., and Elger, C.E. (2011). Depression in epilepsy: a critical review from a clinical perspective.  
488 *Nat. Rev. Neurol.* *7*, 462–472.
- 489 Kanter-Schlifke, I., Georgievska, B., Kirik, D., and Kokaia, M. (2007). Seizure Suppression by GDNF  
490 Gene Therapy in Animal Models of Epilepsy. *Mol. Ther.* *15*, 1106–1113.

- 491 Kantor, B., McCown, T., Leone, P., and Gray, S.J. (2014). Chapter Two - Clinical Applications Involving  
492 CNS Gene Transfer. In *Advances in Genetics*, J.C.D. and S.F.G. Theodore Friedmann, ed. (Academic  
493 Press), pp. 71–124.
- 494 Kätzel, D., Nicholson, E., Schorge, S., Walker, M.C., and Kullmann, D.M. (2014). Chemical-genetic  
495 attenuation of focal neocortical seizures. *Nat. Commun.* 5, 3847.
- 496 Kullmann, D.M., Schorge, S., Walker, M.C., and Wykes, R.C. (2014). Gene therapy in epilepsy-is it  
497 time for clinical trials? *Nat. Rev. Neurol.* 10, 300–304.
- 498 Kwan, P., Schachter, S.C., and Brodie, M.J. (2011). Drug-resistant epilepsy. *N. Engl. J. Med.* 365, 919–  
499 926.
- 500 Lehr, R. (1992). Sixteen S-squared over D-squared: A relation for crude sample size estimates. *Stat.*  
501 *Med.* 11, 1099–1102.
- 502 Lerchner, W., Corgiat, B., Der Minassian, V., Saunders, R.C., and Richmond, B.J. (2014). Injection  
503 parameters and virus dependent choice of promoters to improve neuron targeting in the nonhuman  
504 primate brain. *Gene Ther.*
- 505 Lhatoo, S.D., Solomon, J.K., McEvoy, A.W., Kitchen, N.D., Shorvon, S.D., and Sander, J.W. (2003). A  
506 prospective study of the requirement for and the provision of epilepsy surgery in the United  
507 Kingdom. *Epilepsia* 44, 673–676.
- 508 Lin, E.-J.D., Young, D., Baer, K., Herzog, H., and Doring, M.J. (2006). Differential actions of NPY on  
509 seizure modulation via Y1 and Y2 receptors: evidence from receptor knockout mice. *Epilepsia* 47,  
510 773–780.
- 511 Lobb, C. (2014). Abnormal Bursting as a Pathophysiological Mechanism in Parkinson’s Disease. *Basal*  
512 *Ganglia* 3, 187–195.
- 513 Lundberg, C., Björklund, T., Carlsson, T., Jakobsson, J., Hantraye, P., Déglon, N., and Kirik, D. (2008).  
514 Applications of lentiviral vectors for biology and gene therapy of neurological disorders. *Curr. Gene*  
515 *Ther.* 8, 461–473.
- 516 McCown, T.J. (2006). Adeno-associated Virus-Mediated Expression and Constitutive Secretion of  
517 Galanin Suppresses Limbic Seizure Activity in Vivo. *Mol Ther* 14, 63–68.
- 518 Ngugi, A.K., Bottomley, C., Kleinschmidt, I., Sander, J.W., and Newton, C.R. (2010). Estimation of the  
519 burden of active and life-time epilepsy: a meta-analytic approach. *Epilepsia* 51, 883–890.
- 520 Nikitidou, L., Torp, M., Fjord-Larsen, L., Kusk, P., Wahlberg, L.U., and Kokaia, M. (2014). Encapsulated  
521 galanin-producing cells attenuate focal epileptic seizures in the hippocampus. *Epilepsia* 55, 167–174.
- 522 Noè, F., Pool, A.-H., Nissinen, J., Gobbi, M., Bland, R., Rizzi, M., Balducci, C., Ferraguti, F., Sperk, G.,  
523 Doring, M.J., et al. (2008). Neuropeptide Y gene therapy decreases chronic spontaneous seizures in a  
524 rat model of temporal lobe epilepsy. *Brain* 131, 1506–1515.
- 525 Palfi, S., Gurruchaga, J.M., Ralph, G.S., Lepetit, H., Lavis, S., Buttery, P.C., Watts, C., Miskin, J.,  
526 Kelleher, M., Deeley, S., et al. (2014). Long-term safety and tolerability of ProSavin, a lentiviral  
527 vector-based gene therapy for Parkinson’s disease: a dose escalation, open-label, phase 1/2 trial.  
528 *Lancet Lond. Engl.* 383, 1138–1146.

- 529 Picot, M.-C., Baldy-Moulinier, M., Daurès, J.-P., Dujols, P., and Crespel, A. (2008). The prevalence of  
530 epilepsy and pharmaco-resistant epilepsy in adults: a population-based study in a Western European  
531 country. *Epilepsia* 49, 1230–1238.
- 532 Rahim, A.A., Wong, A.M.S., Howe, S.J., Buckley, S.M.K., Acosta-Saltos, A.D., Elston, K.E., Ward, N.J.,  
533 Philpott, N.J., Cooper, J.D., Anderson, P.N., et al. (2009). Efficient gene delivery to the adult and fetal  
534 CNS using pseudotyped non-integrating lentiviral vectors. *Gene Ther.* 16, 509–520.
- 535 Richichi, C., Lin, E.-J.D., Stefanin, D., Colella, D., Ravizza, T., Grignaschi, G., Veglianesi, P., Sperk, G.,  
536 During, M.J., and Vezzani, A. (2004). Anticonvulsant and antiepileptogenic effects mediated by  
537 adeno-associated virus vector neuropeptide Y expression in the rat hippocampus. *J. Neurosci. Off. J.*  
538 *Soc. Neurosci.* 24, 3051–3059.
- 539 Schuele, S.U., and Lüders, H.O. (2008). Intractable epilepsy: management and therapeutic  
540 alternatives. *Lancet Neurol.* 7, 514–524.
- 541 Snowball, A., and Schorge, S. (2015). Changing channels in pain and epilepsy: Exploiting ion channel  
542 gene therapy for disorders of neuronal hyperexcitability. *FEBS Lett.* 589, 1620–1634.
- 543 Suwanmanee, T., Hu, G., Gui, T., Bartholomae, C.C., Kutschera, I., von Kalle, C., Schmidt, M.,  
544 Monahan, P.E., and Kafri, T. (2014). Integration-deficient lentiviral vectors expressing codon-  
545 optimized R338L human FIX restore normal hemostasis in Hemophilia B mice. *Mol. Ther. J. Am. Soc.*  
546 *Gene Ther.* 22, 567–574.
- 547 Tomlinson, S.E., Rajakulendran, S., Tan, S.V., Graves, T.D., Bamiou, D.E., Labrum, R.W., Burke, D.,  
548 Sue, C.M., Giunti, P., Schorge, S., et al. (2013). Clinical, genetic, neurophysiological and functional  
549 study of new mutations in episodic ataxia type 1. *J Neurol Neurosurg Psychiatry.*
- 550 Woldbye, D.P.D., Angehagen, M., Gøtzsche, C.R., Elbrønd-Bek, H., Sørensen, A.T., Christiansen, S.H.,  
551 Olesen, M.V., Nikitidou, L., Hansen, T.V.O., Kanter-Schlifke, I., et al. (2010). Adeno-associated viral  
552 vector-induced overexpression of neuropeptide Y Y2 receptors in the hippocampus suppresses  
553 seizures. *Brain J. Neurol.* 133, 2778–2788.
- 554 Wykes, R.C., Heeroma, J.H., Mantoan, L., Zheng, K., MacDonald, D.C., Deisseroth, K., Hashemi, K.S.,  
555 Walker, M.C., Schorge, S., and Kullmann, D.M. (2012). Optogenetic and potassium channel gene  
556 therapy in a rodent model of focal neocortical epilepsy. *Sci. Transl. Med.* 4, 161ra152.
- 557 Yaguchi, M., Ohashi, Y., Tsubota, T., Sato, A., Koyano, K.W., Wang, N., and Miyashita, Y. (2013).  
558 Characterization of the properties of seven promoters in the motor cortex of rats and monkeys after  
559 lentiviral vector-mediated gene transfer. *Hum. Gene Ther. Methods* 24, 333–344.
- 560 Yáñez-Muñoz, R.J., Balagán, K.S., MacNeil, A., Howe, S.J., Schmidt, M., Smith, A.J., Buch, P.,  
561 MacLaren, R.E., Anderson, P.N., Barker, S.E., et al. (2006). Effective gene therapy with nonintegrating  
562 lentiviral vectors. *Nat. Med.* 12, 348–353.

563

564 **Figures and legends**

565

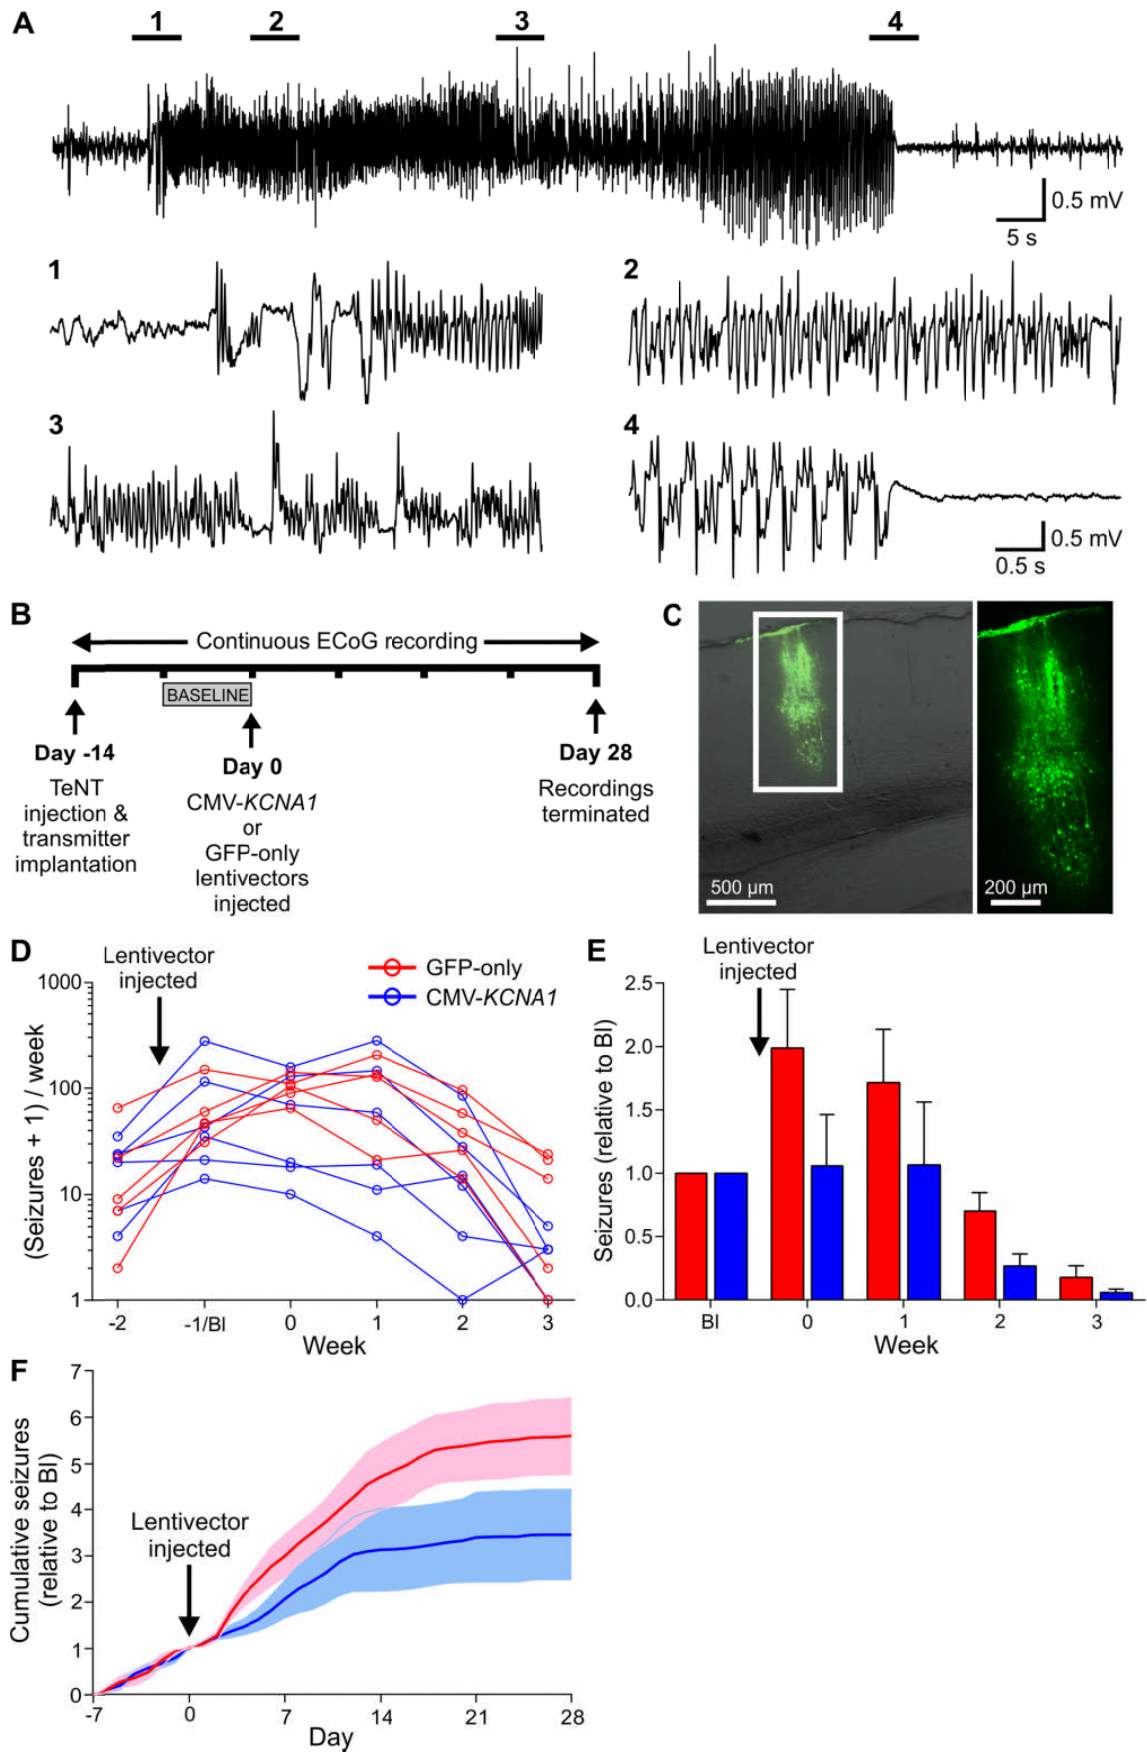

566

567 **Figure 1: A pilot study suggests *KCNA1* gene therapy can suppress genuine discrete seizures in the**  
568 **visual cortex TeNT model of FNE.**

569 A. Representative occipital cortex seizure experienced by an adult rat 2 weeks after injection of TeNT  
570 into the primary visual cortex. Expanded sections are taken at the times indicated. Video footage of  
571 the behaviours associated with this electrographic seizure is provided in Fig EV1.

572 B. Timeline highlighting key experimental milestones.

573 C. Neuronal transduction with the CMV-*KCNA1* lentivector was restricted to a narrow column of  
574 cortex surrounding the site of injection additional images in Fig EV2.

575 D. Number of seizures (per week) experienced by animals injected with the CMV-*KCNA1* lentivector  
576 (blue; n = 6) or its GFP-only control (red; n = 5). Data are plotted on a logarithmic scale after  
577 incrementing each seizure count by 1 to avoid zero values.

578 E. Normalized seizure frequency (per week) for the two groups. The numbers of seizures  
579 experienced each week were normalized to the number experienced by each animal in the week  
580 preceding treatment (week B1).

581 F. Normalized cumulative seizure frequency (per day). Cumulative seizure counts were also  
582 normalized to the total number experienced in week B1.

583 Data in panels E and F are presented as mean  $\pm$  the standard error of the mean (SEM).

584



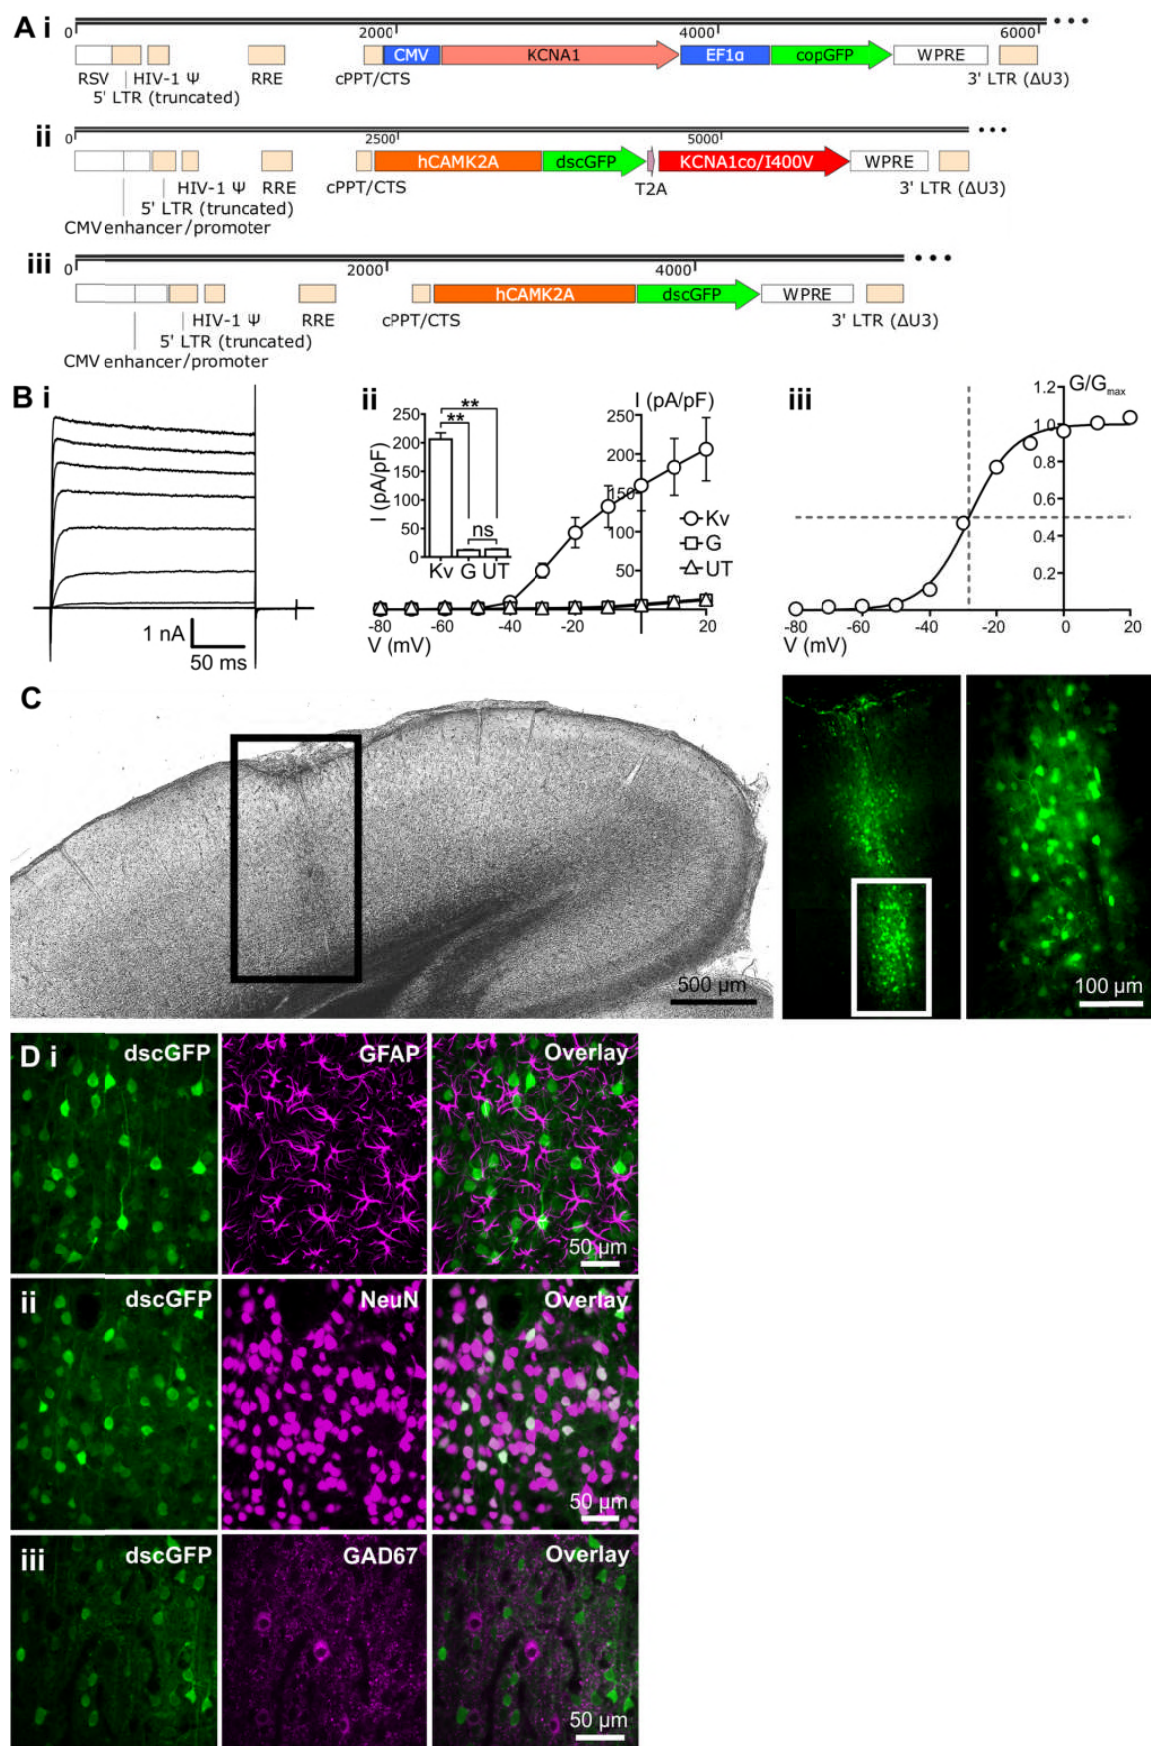

585

586

587 **Figure 2: Design and characterization of an EKC gene therapy optimized for clinical translation.**

588 A. Lentiviral transfer plasmid maps for the CMV-*KCNA1* pilot vector (i), the optimized EKC vector (ii)  
589 and its dscGFP-only control (iii). Abbreviations: RSV – Rous sarcoma virus promoter; LTR – long  
590 terminal repeat; HIV-1  $\Psi$  – HIV-1 packaging signal; RRE – Rev response element; cPPT/CTS – central  
591 polypurine tract and central termination sequence; EF1 $\alpha$  – elongation factor 1  $\alpha$  promoter; WPRE –  
592 woodchuck hepatitis virus post-transcriptional regulatory element.

593 B. Heterologous expression of functional Kv1.1 channels from the optimized EKC transfer plasmid.  
594 (i): Representative current-time trace from a Neuro-2a cell transfected with the EKC transfer  
595 plasmid. (ii): Plot of mean current density against voltage for cells transfected with the EKC transfer  
596 plasmid (Kv; n=13), cells transfected with the dscGFP-only control plasmid (G; n=8), and  
597 untransfected controls (UT; n=10). Inset: histogram showing differences in current density between  
598 the three groups during the voltage step to +20 mV (Kv vs. UT: p=0.0013; Kv vs. G: p=0.0012; UT vs.  
599 G: p=0.82; ns = not significant; Welch's one-way ANOVA with Games-Howell post-hoc tests). (iii):  
600 Plot of mean normalized conductance against voltage for cells transfected with the EKC transfer  
601 plasmid. Data are fit with a single Boltzmann function. The  $V_{0.5}$  (voltage of half-maximal  
602 conductance) of -28.2 mV is similar to values obtained from human embryonic kidney 293 (HEK293)  
603 cells transfected with CMV-driven, wild-type *KCNA1* (-32.8  $\pm$  0.9 mV)(Tomlinson et al., 2013). All  
604 error bars represent SEM.

605 C. Bright-field and fluorescence images of a brain slice from a rat injected in the left visual cortex  
606 with 1.25  $\mu$ l ( $\sim$ 3.0  $\times$  10<sup>6</sup> infectious units (IU)) of the EKC lentivector. The pattern of transduction is  
607 similar to that observed with the CMV-*KCNA1* vector.

608 D. Immunohistochemical assessment of the cell type specificity of EKC expression. (i): There was no  
609 overlap between transduced neurons expressing dscGFP and astrocytes stained for GFAP. (ii): There  
610 was 100% overlap between dscGFP+ cells and neurons stained for NeuN. (iii): Minimal overlap was  
611 observed between dscGFP+ cells and inhibitory interneurons stained for GAD67.  
612

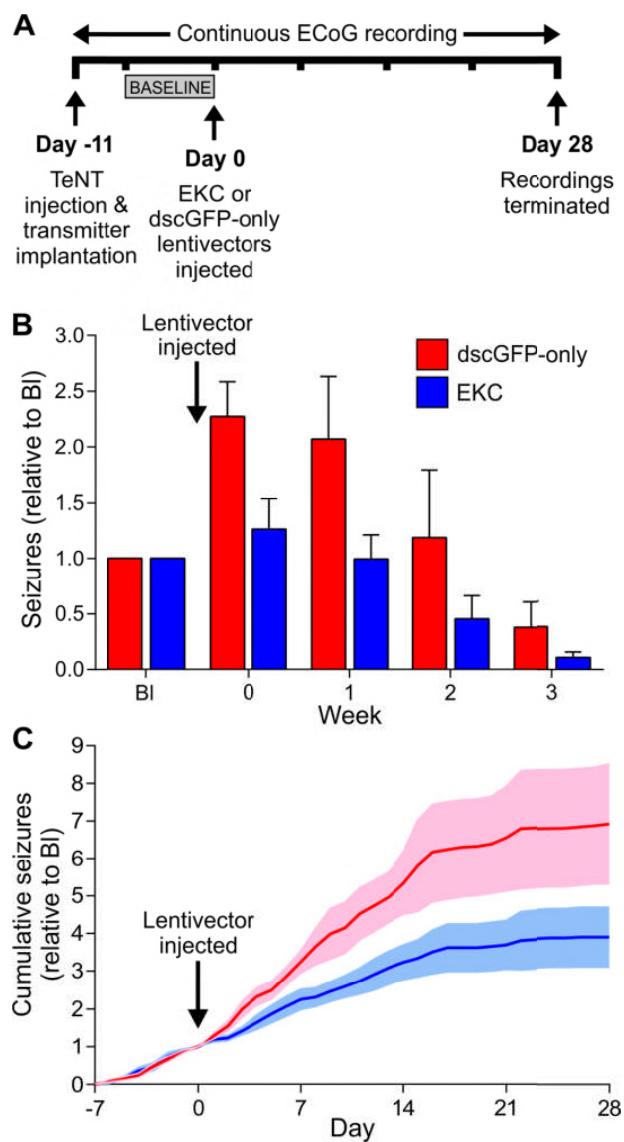

613

614

615 **Figure 3: EKC gene therapy robustly reduces seizure frequency in a blinded, randomized, placebo-**  
 616 **controlled pre-clinical trial.**

617 A. Timeline highlighting key experimental milestones. Note the injection of lentiviral vectors 11 days  
 618 after TeNT delivery.

619 B. Normalized seizure frequency (per week) for animals treated with the EKC lentivector (blue; n =  
 620 7/6) or its dscGFP-only control (red; n = 11).

621 C. Normalized cumulative seizure frequency (per day).

622 Data in panels B and C are presented as mean  $\pm$  SEM.



623 **Expanded View figures and legends**

624

625 **See separate .mp4 file for Expanded View Figure 1.**

626

627 **Fig EV1: Time-locked video-ECoG recording of a spontaneous discrete seizure in the visual cortex**

628 **TeNT model of FNE.**

629 As previously described (Chang et al., 2018) electrographic seizures in this model were accompanied

630 by overt behaviours including sudden increases in arousal, repetitive eye blinking, rearing, bilateral

631 limb twitching and wet dog shakes. Displayed is a representative video-ECoG recording of a rat

632 experiencing a focal to bilateral tonic-clonic seizure.

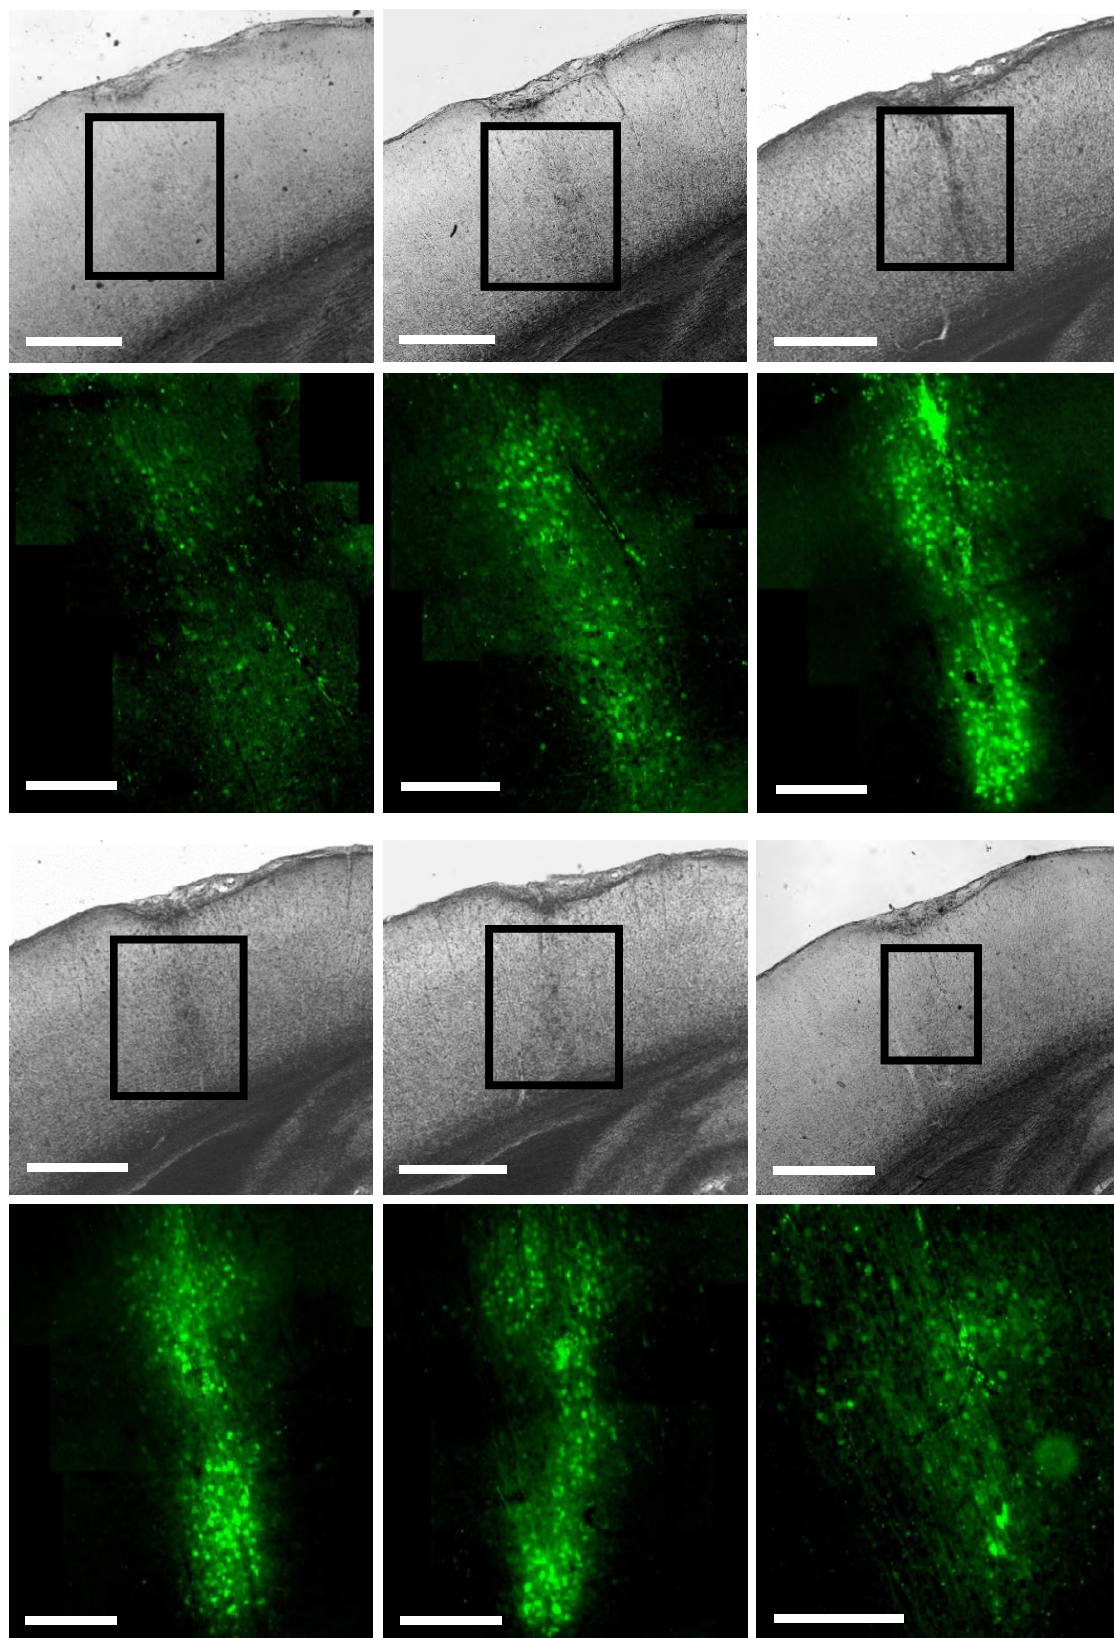

633

634 **Fig EV2: Spread of transduction with the EKC lentivector.**

635 Bright-field and fluorescence images of 6 sequential left-hemisphere visual cortex slices (70  $\mu\text{m}$   
636 thick) from a rat brain injected with 1.25  $\mu\text{l}$  ( $\sim 3.0 \times 10^6$  IU) of the EKC lentivector. Slices are ordered  
637 from top left (rostral) to bottom right (caudal). Scale bars represent 600  $\mu\text{m}$  and 200  $\mu\text{m}$  for bright-  
638 field and fluorescence images, respectively.
